# Supplementary material for: Mitigating the Scintillation Effect on GNSS Signals Using MP and ROTI
Source: MDPI journal article supplement (doi:10.3390/rs14236089), 2022-12-01
Supplement: s1 [file s1]

Archive with 1 entries (1 files):
- remotesensing-1973064-supplementary.pdf
