# Supplementary material for: Mitigating the Scintillation Effect on GNSS Signals Using MP and ROTI
Source: MDPI journal article supplement (doi:10.3390/rs14236089), 2022-12-01
Supplement: s1 [file s1 › remotesensing-1973064-supplementary.pdf]

## Electronic Supporting Material

### Mitigating the Scintillation Effect on GPS Signals Using MP and ROTI

Chendong Li<sup>1</sup>, Craig M. Hancock<sup>2</sup>, Sreeja Vadakke Veetil<sup>3</sup>, Dongsheng Zhao<sup>4,5</sup>, and Nicholas A. S. Hamm<sup>1\*</sup>

<sup>1</sup>Faculty of Science and Engineering, University of Nottingham, Ningbo 315100, China;

<sup>2</sup>School of Architecture, Building and Civil Engineering, Loughborough University, Loughborough LE11 3TU, UK;

<sup>3</sup>Nottingham Geospatial Institute, University of Nottingham, Nottingham, NG7 2TU, UK;

<sup>4</sup>NASG Key Laboratory of Land Environment and Disaster Monitoring, China University of Mining and Technology, Xuzhou 221116, China;

<sup>5</sup>School of Environment and Spatial Informatics, China University of Mining and Technology, Xuzhou 221116, China;

\* Correspondence: [nicholas.hamm@nottingham.edu.cn](mailto:nicholas.hamm@nottingham.edu.cn)

This document has two parts

1. The Kalman Filter method, which is used in the main part of this paper, is summarized. For further details the interested reader should consult the references provided.
2. Detailed results for the observations-removal strategy presented in the main body of our paper are provided. Whereas the results are summarized in the main body of the manuscript, detailed results for each scintillation day and each station are presented here.

## S1. KF and Extended KF(EKF) formulae

The state is predicted using the dynamic model and state at the previous epoch [1]:

$$\mathbf{x}_{k/k-1} = \Phi \mathbf{x}_{k-1/k-1} \quad (S1)$$

where  $\mathbf{x}$  is the state;  $k/k-1$  represents the prediction at the epoch  $k$  from the epoch  $k-1$ ; and  $k-1/k-1$  represents the update at epoch  $k-1$ ;  $\Phi$  is the dynamic model. The corresponding covariance matrix is also predicted as:

$$\mathbf{P}_{k/k-1} = \Phi \mathbf{P}_{k-1/k-1} \Phi^T + \mathbf{Q}_{k-1} \quad (S2)$$

where  $\mathbf{P}$  is the covariance matrix;  $\Phi^T$  is the transpose of the dynamic model;  $\mathbf{Q}$  is the process noise covariance. The innovation vector is then formed as:

$$\mathbf{y}_k = \mathbf{z}_k - \mathbf{H}_k \mathbf{x}_{k/k-1} \quad (S3)$$

where  $\mathbf{y}$  is the innovation vector;  $\mathbf{z}$  is the measurement;  $\mathbf{H}$  is the observation model. Next, the Kalman gain is calculated as follow:

$$\mathbf{K}_k = \mathbf{P}_{k/k-1} \mathbf{H}_k^T (\mathbf{H}_k \mathbf{P}_{k/k-1} \mathbf{H}_k^T + \mathbf{R}_k)^{-1} \quad (S4)$$

where  $\mathbf{K}$  is the Kalman gain;  $\mathbf{H}^T$  is the transpose of the observation model;  $\mathbf{R}$  is the measurement error. Next, updating is applied to the state and corresponding covariance matrix in equations (S5) and (S6) respectively:

$$\mathbf{x}_{k/k} = \mathbf{x}_{k/k-1} - \mathbf{K}_k \mathbf{y}_k \quad (S5)$$

$$\mathbf{P}_{k/k} = (\mathbf{I} - \mathbf{K}_k \mathbf{H}_k) \mathbf{P}_{k/k-1} \quad (S6)$$

where  $\mathbf{I}$  is the identity matrix. Next, the iteration is implemented for all the observations. However, KF can only be applied for linear estimation, which is not suitable for GNSS applications. Thus, EKF can be applied instead where the dynamic and observation models are replaced with nonlinear ones [1]. Therefore, formulae (S1) and (S3) are replaced with formulae (S7) and (S8):

$$\mathbf{x}_{k/k-1} = \phi(\mathbf{x}_{k-1/k-1}) \quad (S7)$$

$$\mathbf{y}_k = \mathbf{z}_k - \mathbf{h}(\mathbf{x}_{k/k-1}) \quad (S8)$$

where  $\phi$  and  $\mathbf{h}$  are the nonlinear dynamic and observation models respectively. Moreover,  $\Phi$  and  $\mathbf{H}_k$  for the computation of the covariance matrix are defined with Jacobians instead:

$$\Phi = \left. \frac{\partial \phi}{\partial \mathbf{x}} \right|_{\mathbf{x}_{k-1/k-1}} \quad (S9)$$

$$\mathbf{H}_k = \left. \frac{\partial \mathbf{h}}{\partial \mathbf{x}} \right|_{\mathbf{x}_{k/k-1}} \quad (S10)$$

## S2. Adaptive robust KF (ARKF)

Positioning can be performed by applying EKF and using the a priori information of the process and measurement noise. However, it may not be possible to acquire the a priori information [2], as was the case in our study. Thus, we used ARKF to overcome this problem in PPPH [3]. The only difference between ARKF and EKF is that an adaptive factor (also referred to as the inflation factor) is applied to the Kalman gain and measurement noise covariance [2]. Thus, the equation (S4) was replaced with equations (S11)-(S14):

$$\mathbf{K}_k' = \frac{1}{\alpha_k} \mathbf{P}_{k/k-1} \mathbf{H}_k^T \left( \frac{1}{\alpha_k} \mathbf{H}_k \mathbf{P}_{k/k-1} \mathbf{H}_k^T + \mathbf{R}_k' \right)^{-1} \quad (S11)$$

$$\alpha_k = \begin{cases} 1, & |\bar{\mathbf{y}}_k| \leq c_0 \\ \frac{c_0}{|\bar{\mathbf{y}}_k|} \left( \frac{c_1 - |\bar{\mathbf{y}}_k|}{c_1 - c_0} \right)^2, & c_0 < |\bar{\mathbf{y}}_k| \leq c_1 \\ 0, & |\bar{\mathbf{y}}_k| > c_1 \end{cases} \quad (S12)$$

$$\bar{Y}_k = \frac{\sum_{i=1}^{n_k} y_k^2}{\sum_{i=1}^{n_k} \sigma_{y_k}^2}$$

$$R_k' = R_k / \gamma_k \quad (S13)$$

$$\gamma_k = \begin{cases} 1, & |v_k| \leq k_0 \\ \frac{k_0}{|v_k|} \left( \frac{k_1 - |v_k|}{k_1 - k_0} \right)^2, & c_0 < |v_k| \leq k_1 \\ 0, & |v_k| > k_1 \end{cases} \quad (S14)$$

where  $\alpha_k$  and  $\gamma_k$  are inflation factors;  $c_0, c_1, k_0$  and  $k_1$  are constants with empirical values:  $1.5 < c_0 < 3.0$ ,  $3.0 < c_1 < 8.0$ ,  $1.5 < k_0 < 3.0$  and  $3.0 < k_1 < 8.0$ ;  $\sigma_{y_k}$  is the standard deviation of  $y_k$ ;  $n_k$  is the innovation numbers;  $v_k$  is the standardized residual. With the inflation factors varying from 0 to 1, the influence of outliers in measurements was compensated.

Table S1. Change of the height and 3D positioning errors through the observation removal strategy based on MT at SAO0P on 2017-09-07. Improved RMSEs (m) are highlighted in bold.

| Station | Date     | Original RMSE |        | Permutations<br>and<br>combinations | Observation-<br>removed RMSE |               |
|---------|----------|---------------|--------|-------------------------------------|------------------------------|---------------|
|         |          | height        | 3D     |                                     | height                       | 3D            |
| SAO0P   | 20170907 | 0.0144        | 0.0180 | $\sigma_\phi$                       | 0.0145                       | <b>0.0175</b> |
|         |          |               |        | S4                                  | 0.0170                       | 0.0203        |
|         |          |               |        | $\sigma_\phi$ , S4                  | 0.0214                       | 0.0234        |
|         |          |               |        | ROTI                                | <b>0.0115</b>                | 0.0192        |
|         |          |               |        | MP2                                 | <b>0.0044</b>                | <b>0.0057</b> |
|         |          |               |        | MP1                                 | 0.0270                       | 0.0307        |
|         |          |               |        | MP2, ROTI                           | <b>0.0031</b>                | <b>0.0050</b> |
|         |          |               |        | MP1, ROTI                           | <b>0.0073</b>                | <b>0.0078</b> |
|         |          |               |        | MP1, MP2                            | <b>0.0015</b>                | <b>0.0036</b> |
|         |          |               |        | MP1, MP2,<br>ROTI                   | <b>0.0014</b>                | <b>0.0042</b> |

Table S2. Change of the height and 3D positioning errors through the observation removal strategy based on MT at SAO0P on 2017-09-08. Improved RMSEs (m) are highlighted in bold.

| Station | Date     | Original RMSE |        | Permutations<br>and<br>combinations | Observation-<br>removed RMSE |               |
|---------|----------|---------------|--------|-------------------------------------|------------------------------|---------------|
|         |          | height        | 3D     |                                     | height                       | 3D            |
| SAO0P   | 20170908 | 0.6245        | 0.6422 | $\sigma_\phi$                       | <b>0.0981</b>                | <b>0.1255</b> |
|         |          |               |        | S4                                  | <b>0.3661</b>                | <b>0.4013</b> |
|         |          |               |        | $\sigma_\phi$ , S4                  | <b>0.1046</b>                | <b>0.1261</b> |
|         |          |               |        | ROTI                                | <b>0.1828</b>                | <b>0.2087</b> |
|         |          |               |        | MP2                                 | 0.6771                       | 0.6954        |
|         |          |               |        | MP1                                 | <b>0.4566</b>                | <b>0.4961</b> |
|         |          |               |        | MP2, ROTI                           | <b>0.0718</b>                | <b>0.0780</b> |
|         |          |               |        | MP1, ROTI                           | <b>0.1756</b>                | <b>0.1979</b> |
|         |          |               |        | MP1, MP2                            | 0.7069                       | 0.7238        |
|         |          |               |        | MP1, MP2,<br>ROTI                   | <b>0.0885</b>                | <b>0.0946</b> |

Table S3. Change of the height and 3D positioning errors through the observation removal strategy based on MT at SAO0P on 2017-09-08. Improved RMSEs (m) are highlighted in bold.

| Station | Date     | Original RMSE |        | Permutations<br>and<br>combinations | Observation-<br>removed RMSE |               |
|---------|----------|---------------|--------|-------------------------------------|------------------------------|---------------|
|         |          | height        | 3D     |                                     | height                       | 3D            |
| SAO0P   | 20170913 | 0.1395        | 0.1581 | $\sigma_\phi$                       | <b>0.0345</b>                | <b>0.0518</b> |
|         |          |               |        | S4                                  | <b>0.0283</b>                | <b>0.0321</b> |
|         |          |               |        | $\sigma_\phi$ , S4                  | <b>0.0248</b>                | <b>0.0259</b> |
|         |          |               |        | ROTI                                | <b>0.0172</b>                | <b>0.0308</b> |
|         |          |               |        | MP2                                 | <b>0.1012</b>                | <b>0.1573</b> |
|         |          |               |        | MP1                                 | <b>0.0559</b>                | <b>0.0635</b> |
|         |          |               |        | MP2, ROTI                           | <b>0.0182</b>                | <b>0.0210</b> |
|         |          |               |        | MP1, ROTI                           | <b>0.0345</b>                | <b>0.0360</b> |
|         |          |               |        | MP1, MP2                            | <b>0.0880</b>                | <b>0.1472</b> |
|         |          |               |        | MP1, MP2,<br>ROTI                   | <b>0.0270</b>                | <b>0.0289</b> |

Table S4. Change of the height and 3D positioning errors through the observation removal strategy based on MT at SJCU on 2017-09-04. Improved RMSEs (m) are highlighted in bold.

| Station | Date     | Original RMSE |        | Permutations<br>and<br>combinations | Observation-<br>removed RMSE |               |
|---------|----------|---------------|--------|-------------------------------------|------------------------------|---------------|
|         |          | height        | 3D     |                                     | height                       | 3D            |
| SJCU    | 20170904 | 0.0260        | 0.0345 | $\sigma_\phi$                       | 0.0435                       | 0.0452        |
|         |          |               |        | S4                                  | <b>0.0205</b>                | <b>0.0279</b> |
|         |          |               |        | $\sigma_\phi$ , S4                  | 0.0429                       | 0.0460        |
|         |          |               |        | ROTI                                | <b>0.0248</b>                | <b>0.0330</b> |
|         |          |               |        | MP2                                 | 0.0340                       | 0.0465        |
|         |          |               |        | MP1                                 | <b>0.0254</b>                | <b>0.0276</b> |
|         |          |               |        | MP2, ROTI                           | 0.0342                       | 0.0474        |
|         |          |               |        | MP1, ROTI                           | 0.0262                       | <b>0.0284</b> |
|         |          |               |        | MP1, MP2                            | 0.0418                       | 0.0490        |
|         |          |               |        | MP1, MP2,<br>ROTI                   | 0.0417                       | 0.0492        |

Table S5. Change of the height and 3D positioning errors through the observation removal strategy based on MT at SJCUC on 2017-09-07. Improved RMSEs (m) are highlighted in bold.

| Station | Date     | Original RMSE |        | Permutations<br>and<br>combinations | Observation-<br>removed RMSE |               |
|---------|----------|---------------|--------|-------------------------------------|------------------------------|---------------|
|         |          | height        | 3D     |                                     | height                       | 3D            |
| SJCUC   | 20170907 | 0.0247        | 0.0311 | $\sigma_\phi$                       | 0.0285                       | <b>0.0308</b> |
|         |          |               |        | S4                                  | 0.0313                       | 0.0321        |
|         |          |               |        | $\sigma_\phi$ , S4                  | 0.0388                       | 0.0395        |
|         |          |               |        | ROTI                                | 0.0315                       | 0.0320        |
|         |          |               |        | MP2                                 | 0.0329                       | 0.0399        |
|         |          |               |        | MP1                                 | 0.0298                       | <b>0.0301</b> |
|         |          |               |        | MP2, ROTI                           | 0.0339                       | 0.0401        |
|         |          |               |        | MP1, ROTI                           | 0.0300                       | <b>0.0303</b> |
|         |          |               |        | MP1, MP2                            | 0.0331                       | 0.0373        |
|         |          |               |        | MP1, MP2,<br>ROTI                   | 0.0343                       | 0.0373        |

Table S6. Change of the height and 3D positioning errors through the observation removal strategy based on MT at SJCUC on 2017-09-08. Improved RMSEs (m) are highlighted in bold.

| Station | Date     | Original RMSE |        | Permutations<br>and<br>combinations | Observation-<br>removed RMSE |               |
|---------|----------|---------------|--------|-------------------------------------|------------------------------|---------------|
|         |          | height        | 3D     |                                     | height                       | 3D            |
| SJCUC   | 20170908 | 0.1355        | 0.3454 | $\sigma_\phi$                       | 0.2160                       | <b>0.2731</b> |
|         |          |               |        | S4                                  | 1.5847                       | 1.6025        |
|         |          |               |        | $\sigma_\phi$ , S4                  | 0.2205                       | <b>0.2808</b> |
|         |          |               |        | ROTI                                | 0.2461                       | <b>0.3328</b> |
|         |          |               |        | MP2                                 | 0.3595                       | 0.3801        |
|         |          |               |        | MP1                                 | 0.2776                       | <b>0.3248</b> |
|         |          |               |        | MP2, ROTI                           | <b>0.1201</b>                | <b>0.1418</b> |
|         |          |               |        | MP1, ROTI                           | 0.2142                       | <b>0.3107</b> |
|         |          |               |        | MP1, MP2                            | 0.1731                       | <b>0.2521</b> |
|         |          |               |        | MP1, MP2,<br>ROTI                   | <b>0.1129</b>                | <b>0.1249</b> |

Table S7. Change of the height and 3D positioning errors through the observation removal strategy based on MT at SJCU on 2017-09-13. Improved RMSEs (m) are highlighted in bold.

| Station | Date     | Original RMSE |        | Permutations<br>and<br>combinations | Observation-<br>removed RMSE |               |
|---------|----------|---------------|--------|-------------------------------------|------------------------------|---------------|
|         |          | height        | 3D     |                                     | height                       | 3D            |
| SJCU    | 20170913 | 0.0219        | 0.0329 | $\sigma_\phi$                       | <b>0.0188</b>                | <b>0.0282</b> |
|         |          |               |        | S4                                  | <b>0.0157</b>                | <b>0.0269</b> |
|         |          |               |        | $\sigma_\phi$ , S4                  | <b>0.0193</b>                | <b>0.0298</b> |
|         |          |               |        | ROTI                                | 0.0646                       | 0.0850        |
|         |          |               |        | MP2                                 | 0.0302                       | 0.0564        |
|         |          |               |        | MP1                                 | 0.0258                       | 0.0370        |
|         |          |               |        | MP2, ROTI                           | 0.0795                       | 0.1280        |
|         |          |               |        | MP1, ROTI                           | 0.0402                       | 0.0551        |
|         |          |               |        | MP1, MP2                            | 0.0261                       | 0.0502        |
|         |          |               |        | MP1, MP2,<br>ROTI                   | 0.0787                       | 0.1242        |

Table S8. Change of the height and 3D positioning errors through the observation removal strategy based on MT at SNA0P on 2016-02-18. Improved RMSEs (m) are highlighted in bold.

| Station | Date     | Original RMSE |        | Permutations<br>and<br>combinations | Observation-<br>removed RMSE |               |
|---------|----------|---------------|--------|-------------------------------------|------------------------------|---------------|
|         |          | height        | 3D     |                                     | height                       | 3D            |
| SNA0P   | 20160218 | 0.1699        | 0.2148 | $\sigma_\phi$                       | <b>0.1671</b>                | <b>0.2125</b> |
|         |          |               |        | S4                                  | 0.1877                       | 0.2263        |
|         |          |               |        | $\sigma_\phi$ , S4                  | <b>0.1583</b>                | <b>0.2064</b> |
|         |          |               |        | ROTI                                | 0.2319                       | 0.2828        |
|         |          |               |        | MP2                                 | 0.2433                       | 0.2835        |
|         |          |               |        | MP1                                 | 0.2174                       | 0.2651        |
|         |          |               |        | MP2, ROTI                           | 0.3193                       | 0.3426        |
|         |          |               |        | MP1, ROTI                           | 0.2889                       | 0.3164        |
|         |          |               |        | MP1, MP2                            | 0.2036                       | 0.2424        |
|         |          |               |        | MP1, MP2,<br>ROTI                   | 0.3450                       | 0.3676        |

Table S9. Change of the height and 3D positioning errors through the observation removal strategy based on MT at SNA0P on 2016-04-02. Improved RMSEs (m) are highlighted in bold.

| Station | Date     | Original RMSE |        | Permutations<br>and<br>combinations | Observation-<br>removed RMSE |               |
|---------|----------|---------------|--------|-------------------------------------|------------------------------|---------------|
|         |          | height        | 3D     |                                     | height                       | 3D            |
| SNA0P   | 20160402 | 0.0087        | 0.0329 | $\sigma_\phi$                       | <b>0.0068</b>                | <b>0.0280</b> |
|         |          |               |        | S4                                  | <b>0.0059</b>                | <b>0.0282</b> |
|         |          |               |        | $\sigma_\phi$ , S4                  | <b>0.0066</b>                | <b>0.0283</b> |
|         |          |               |        | ROTI                                | <b>0.0072</b>                | <b>0.0324</b> |
|         |          |               |        | MP2                                 | <b>0.0078</b>                | <b>0.0295</b> |
|         |          |               |        | MP1                                 | <b>0.0064</b>                | <b>0.0285</b> |
|         |          |               |        | MP2, ROTI                           | <b>0.0070</b>                | <b>0.0290</b> |
|         |          |               |        | MP1, ROTI                           | <b>0.0054</b>                | <b>0.0283</b> |
|         |          |               |        | MP1, MP2                            | <b>0.0073</b>                | <b>0.0291</b> |
|         |          |               |        | MP1, MP2,<br>ROTI                   | <b>0.0073</b>                | <b>0.0289</b> |

Table S10. Change of the height and 3D positioning errors through the observation removal strategy based on MT at SNA0P on 2016-04-13. Improved RMSEs (m) are highlighted in bold.

| Station | Date     | Original RMSE |        | Permutations<br>and<br>combinations | Observation-<br>removed RMSE |               |
|---------|----------|---------------|--------|-------------------------------------|------------------------------|---------------|
|         |          | height        | 3D     |                                     | height                       | 3D            |
| SNA0P   | 20160413 | 0.8233        | 0.8521 | $\sigma_\phi$                       | <b>0.1799</b>                | <b>0.2260</b> |
|         |          |               |        | S4                                  | <b>0.4178</b>                | <b>0.6136</b> |
|         |          |               |        | $\sigma_\phi$ , S4                  | <b>0.1834</b>                | <b>0.2262</b> |
|         |          |               |        | ROTI                                | <b>0.1427</b>                | <b>0.2025</b> |
|         |          |               |        | MP2                                 | <b>0.5525</b>                | <b>0.5626</b> |
|         |          |               |        | MP1                                 | 0.8517                       | 0.9361        |
|         |          |               |        | MP2, ROTI                           | <b>0.1161</b>                | <b>0.1800</b> |
|         |          |               |        | MP1, ROTI                           | <b>0.0687</b>                | <b>0.1724</b> |
|         |          |               |        | MP1, MP2                            | <b>0.1997</b>                | <b>0.2997</b> |
|         |          |               |        | MP1, MP2,<br>ROTI                   | <b>0.0801</b>                | <b>0.1760</b> |

Table S11. Change of the height and 3D positioning errors through the observation removal strategy based on MT at SNA0P on 2016-05-09. Improved RMSEs (m) are highlighted in bold.

| Station | Date     | Original RMSE |        | Permutations<br>and<br>combinations | Observation-<br>removed RMSE |               |
|---------|----------|---------------|--------|-------------------------------------|------------------------------|---------------|
|         |          | height        | 3D     |                                     | height                       | 3D            |
| SNA0P   | 20160509 | 0.4466        | 0.5796 | $\sigma_\phi$                       | <b>0.3020</b>                | <b>0.3191</b> |
|         |          |               |        | S4                                  | <b>0.4084</b>                | <b>0.5487</b> |
|         |          |               |        | $\sigma_\phi$ , S4                  | <b>0.3018</b>                | <b>0.3191</b> |
|         |          |               |        | ROTI                                | <b>0.2238</b>                | <b>0.2431</b> |
|         |          |               |        | MP2                                 | <b>0.4407</b>                | <b>0.5573</b> |
|         |          |               |        | MP1                                 | <b>0.4017</b>                | <b>0.4720</b> |
|         |          |               |        | MP2, ROTI                           | <b>0.2139</b>                | <b>0.2496</b> |
|         |          |               |        | MP1, ROTI                           | <b>0.2758</b>                | <b>0.2930</b> |
|         |          |               |        | MP1, MP2                            | <b>0.2794</b>                | <b>0.3374</b> |
|         |          |               |        | MP1, MP2,<br>ROTI                   | <b>0.2229</b>                | <b>0.2591</b> |

Table S12. Change of the height and 3D positioning errors through the observation removal strategy based on MT at SNA0P on 2016-06-06. Improved RMSEs (m) are highlighted in bold.

| Station | Date     | Original RMSE |        | Permutations<br>and<br>combinations | Observation-<br>removed RMSE |               |
|---------|----------|---------------|--------|-------------------------------------|------------------------------|---------------|
|         |          | height        | 3D     |                                     | height                       | 3D            |
| SNA0P   | 20160606 | 0.5636        | 1.1350 | $\sigma_\phi$                       | <b>0.5182</b>                | <b>0.5730</b> |
|         |          |               |        | S4                                  | 1.6784                       | 2.0880        |
|         |          |               |        | $\sigma_\phi$ , S4                  | 0.6953                       | <b>0.7354</b> |
|         |          |               |        | ROTI                                | <b>0.1968</b>                | <b>0.2298</b> |
|         |          |               |        | MP2                                 | 2.0577                       | 2.3840        |
|         |          |               |        | MP1                                 | 1.0227                       | 1.4342        |
|         |          |               |        | MP2, ROTI                           | <b>0.3771</b>                | <b>0.3993</b> |
|         |          |               |        | MP1, ROTI                           | <b>0.1517</b>                | <b>0.1971</b> |
|         |          |               |        | MP1, MP2                            | 1.7578                       | 2.1342        |
|         |          |               |        | MP1, MP2,<br>ROTI                   | <b>0.3778</b>                | <b>0.4000</b> |

Table S13. Change of the height and 3D positioning errors through the observation removal strategy based on MT at SNA0P on 2016-07-28. Improved RMSEs (m) are highlighted in bold.

| Station | Date     | Original RMSE |        | Permutations<br>and<br>combinations | Observation-<br>removed RMSE |               |
|---------|----------|---------------|--------|-------------------------------------|------------------------------|---------------|
|         |          | height        | 3D     |                                     | height                       | 3D            |
| SNA0P   | 20160728 | 0.0099        | 0.0207 | $\sigma_\phi$                       | 0.0105                       | 0.0309        |
|         |          |               |        | S4                                  | <b>0.0091</b>                | <b>0.0204</b> |
|         |          |               |        | $\sigma_\phi$ , S4                  | 0.0122                       | 0.0274        |
|         |          |               |        | ROTI                                | 0.0105                       | 0.0213        |
|         |          |               |        | MP2                                 | 0.0151                       | 0.0352        |
|         |          |               |        | MP1                                 | 0.0136                       | 0.0301        |
|         |          |               |        | MP2, ROTI                           | 0.0168                       | 0.0356        |
|         |          |               |        | MP1, ROTI                           | 0.0131                       | 0.0300        |
|         |          |               |        | MP1, MP2                            | 0.0147                       | 0.0356        |
|         |          |               |        | MP1, MP2,<br>ROTI                   | 0.0145                       | 0.0354        |

Table S14. Change of the height and 3D positioning errors through the observation removal strategy based on MT at SNA0P on 2016-10-13. Improved RMSEs (m) are highlighted in bold.

| Station | Date     | Original RMSE |        | Permutations<br>and<br>combinations | Observation-<br>removed RMSE |        |
|---------|----------|---------------|--------|-------------------------------------|------------------------------|--------|
|         |          | height        | 3D     |                                     | height                       | 3D     |
| SNA0P   | 20161013 | 0.0010        | 0.0228 | $\sigma_\phi$                       | 0.0247                       | 0.0507 |
|         |          |               |        | S4                                  | 0.0023                       | 0.0344 |
|         |          |               |        | $\sigma_\phi$ , S4                  | 0.0256                       | 0.0518 |
|         |          |               |        | ROTI                                | 0.0197                       | 0.0624 |
|         |          |               |        | MP2                                 | 0.0246                       | 0.0625 |
|         |          |               |        | MP1                                 | 0.0039                       | 0.0326 |
|         |          |               |        | MP2, ROTI                           | 0.0121                       | 0.0568 |
|         |          |               |        | MP1, ROTI                           | 0.0257                       | 0.0669 |
|         |          |               |        | MP1, MP2                            | 0.0307                       | 0.0694 |
|         |          |               |        | MP1, MP2,<br>ROTI                   | 0.0171                       | 0.0564 |

Table S15. Change of the height and 3D positioning errors through the observation removal strategy based on MT at SAO0P on 2017-09-07. Improved RMSEs (m) are highlighted in bold.

| Station | Date     | Original RMSE |        | Permutations<br>and<br>combinations | Observation-<br>removed RMSE |               |
|---------|----------|---------------|--------|-------------------------------------|------------------------------|---------------|
|         |          | height        | 3D     |                                     | height                       | 3D            |
| SAO0P   | 20170907 | 0.0144        | 0.0180 | $\sigma_\phi$                       | 0.0165                       | 0.0204        |
|         |          |               |        | S4                                  | <b>0.0121</b>                | <b>0.0167</b> |
|         |          |               |        | $\sigma_\phi$ , S4                  | 0.0160                       | 0.0203        |
|         |          |               |        | ROTI                                | <b>0.0124</b>                | 0.0192        |
|         |          |               |        | MP2                                 | 0.0148                       | <b>0.0178</b> |
|         |          |               |        | MP1                                 | 0.0175                       | 0.0213        |
|         |          |               |        | MP2, ROTI                           | <b>0.0130</b>                | 0.0196        |
|         |          |               |        | MP1, ROTI                           | 0.0179                       | 0.0224        |
|         |          |               |        | MP1, MP2                            | 0.0179                       | 0.0215        |
|         |          |               |        | MP1, MP2,<br>ROTI                   | 0.0183                       | 0.0226        |

Table S16. Change of the height and 3D positioning errors through the observation removal strategy based on MT at SAO0P on 2017-09-08. Improved RMSEs (m) are highlighted in bold.

| Station | Date     | Original RMSE |        | Permutations<br>and<br>combinations | Observation-<br>removed RMSE |               |
|---------|----------|---------------|--------|-------------------------------------|------------------------------|---------------|
|         |          | height        | 3D     |                                     | height                       | 3D            |
| SAO0P   | 20170908 | 0.6245        | 0.6422 | $\sigma_\phi$                       | <b>0.4126</b>                | <b>0.4540</b> |
|         |          |               |        | S4                                  | <b>0.1664</b>                | <b>0.2517</b> |
|         |          |               |        | $\sigma_\phi$ , S4                  | <b>0.4672</b>                | <b>0.5482</b> |
|         |          |               |        | ROTI                                | <b>0.1202</b>                | <b>0.1464</b> |
|         |          |               |        | MP2                                 | <b>0.5154</b>                | <b>0.5376</b> |
|         |          |               |        | MP1                                 | <b>0.5769</b>                | <b>0.5887</b> |
|         |          |               |        | MP2, ROTI                           | <b>0.1174</b>                | <b>0.1420</b> |
|         |          |               |        | MP1, ROTI                           | <b>0.1101</b>                | <b>0.1337</b> |
|         |          |               |        | MP1, MP2                            | <b>0.6117</b>                | <b>0.6208</b> |
|         |          |               |        | MP1, MP2,<br>ROTI                   | <b>0.1069</b>                | <b>0.1310</b> |

Table S17. Change of the height and 3D positioning errors through the observation removal strategy based on MT at SAO0P on 2017-09-08. Improved RMSEs (m) are highlighted in bold.

| Station | Date     | Original RMSE |        | Permutations<br>and<br>combinations | Observation-<br>removed RMSE |               |
|---------|----------|---------------|--------|-------------------------------------|------------------------------|---------------|
|         |          | height        | 3D     |                                     | height                       | 3D            |
| SAO0P   | 20170913 | 0.1395        | 0.1581 | $\sigma_\phi$                       | <b>0.0608</b>                | <b>0.0617</b> |
|         |          |               |        | S4                                  | <b>0.0556</b>                | <b>0.0657</b> |
|         |          |               |        | $\sigma_\phi$ , S4                  | <b>0.0387</b>                | <b>0.0416</b> |
|         |          |               |        | ROTI                                | <b>0.0165</b>                | <b>0.0349</b> |
|         |          |               |        | MP2                                 | 0.1536                       | 0.1683        |
|         |          |               |        | MP1                                 | <b>0.1018</b>                | <b>0.1202</b> |
|         |          |               |        | MP2, ROTI                           | <b>0.0223</b>                | <b>0.0359</b> |
|         |          |               |        | MP1, ROTI                           | <b>0.0239</b>                | <b>0.0382</b> |
|         |          |               |        | MP1, MP2                            | <b>0.1270</b>                | 0.1773        |
|         |          |               |        | MP1, MP2,<br>ROTI                   | <b>0.0269</b>                | <b>0.0387</b> |

Table S18. Change of the height and 3D positioning errors through the observation removal strategy based on MT at SJCU on 2017-09-04. Improved RMSEs (m) are highlighted in bold.

| Station | Date     | Original RMSE |        | Permutations<br>and<br>combinations | Observation-<br>removed RMSE |               |
|---------|----------|---------------|--------|-------------------------------------|------------------------------|---------------|
|         |          | height        | 3D     |                                     | height                       | 3D            |
| SJCU    | 20170904 | 0.0260        | 0.0345 | $\sigma_\phi$                       | 0.0265                       | <b>0.0282</b> |
|         |          |               |        | S4                                  | 0.0268                       | 0.0353        |
|         |          |               |        | $\sigma_\phi$ , S4                  | <b>0.0256</b>                | <b>0.0272</b> |
|         |          |               |        | ROTI                                | <b>0.0255</b>                | <b>0.0339</b> |
|         |          |               |        | MP2                                 | 0.0272                       | <b>0.0289</b> |
|         |          |               |        | MP1                                 | <b>0.0245</b>                | <b>0.0306</b> |
|         |          |               |        | MP2, ROTI                           | 0.0269                       | <b>0.0286</b> |
|         |          |               |        | MP1, ROTI                           | <b>0.0243</b>                | <b>0.0302</b> |
|         |          |               |        | MP1, MP2                            | 0.0270                       | <b>0.0282</b> |
|         |          |               |        | MP1, MP2,<br>ROTI                   | 0.0268                       | <b>0.0279</b> |

Table S19. Change of the height and 3D positioning errors through the observation removal strategy based on MT at SJCUC on 2017-09-07. Improved RMSEs (m) are highlighted in bold.

| Station | Date     | Original RMSE |        | Permutations<br>and<br>combinations | Observation-<br>removed RMSE |               |
|---------|----------|---------------|--------|-------------------------------------|------------------------------|---------------|
|         |          | height        | 3D     |                                     | height                       | 3D            |
| SJCUC   | 20170907 | 0.0247        | 0.0311 | $\sigma_\phi$                       | 0.0282                       | 0.0298        |
|         |          |               |        | S4                                  | 0.0268                       | 0.0331        |
|         |          |               |        | $\sigma_\phi$ , S4                  | 0.0294                       | <b>0.0310</b> |
|         |          |               |        | ROTI                                | 0.0304                       | 0.0311        |
|         |          |               |        | MP2                                 | 0.0302                       | <b>0.0306</b> |
|         |          |               |        | MP1                                 | 0.0292                       | <b>0.0300</b> |
|         |          |               |        | MP2, ROTI                           | 0.0308                       | <b>0.0310</b> |
|         |          |               |        | MP1, ROTI                           | 0.0290                       | <b>0.0295</b> |
|         |          |               |        | MP1, MP2                            | 0.0287                       | <b>0.0291</b> |
|         |          |               |        | MP1, MP2,<br>ROTI                   | 0.0292                       | <b>0.0295</b> |

Table S20. Change of the height and 3D positioning errors through the observation removal strategy based on MT at SJCUC on 2017-09-08. Improved RMSEs (m) are highlighted in bold.

| Station | Date     | Original RMSE |        | Permutations<br>and<br>combinations | Observation-<br>removed RMSE |               |
|---------|----------|---------------|--------|-------------------------------------|------------------------------|---------------|
|         |          | height        | 3D     |                                     | height                       | 3D            |
| SJCUC   | 20170908 | 0.1355        | 0.3454 | $\sigma_\phi$                       | 0.1638                       | 0.3521        |
|         |          |               |        | S4                                  | 0.4893                       | 0.5559        |
|         |          |               |        | $\sigma_\phi$ , S4                  | 0.1638                       | 0.3521        |
|         |          |               |        | ROTI                                | 0.1986                       | <b>0.2357</b> |
|         |          |               |        | MP2                                 | 0.3026                       | 0.4002        |
|         |          |               |        | MP1                                 | <b>0.0632</b>                | <b>0.0839</b> |
|         |          |               |        | MP2, ROTI                           | <b>0.0386</b>                | <b>0.0473</b> |
|         |          |               |        | MP1, ROTI                           | 0.1979                       | <b>0.2342</b> |
|         |          |               |        | MP1, MP2                            | <b>0.0779</b>                | <b>0.2221</b> |
|         |          |               |        | MP1, MP2,<br>ROTI                   | <b>0.0511</b>                | <b>0.0572</b> |

Table S21. Change of the height and 3D positioning errors through the observation removal strategy based on MT at SJCU on 2017-09-13. Improved RMSEs (m) are highlighted in bold.

| Station | Date     | Original RMSE |        | Permutations<br>and<br>combinations | Observation-<br>removed RMSE |               |
|---------|----------|---------------|--------|-------------------------------------|------------------------------|---------------|
|         |          | height        | 3D     |                                     | height                       | 3D            |
| SJCU    | 20170913 | 0.0219        | 0.0329 | $\sigma_\phi$                       | 0.0240                       | <b>0.0328</b> |
|         |          |               |        | S4                                  | <b>0.0153</b>                | <b>0.0275</b> |
|         |          |               |        | $\sigma_\phi$ , S4                  | <b>0.0193</b>                | <b>0.0292</b> |
|         |          |               |        | ROTI                                | 0.0332                       | 0.0440        |
|         |          |               |        | MP2                                 | 0.0264                       | 0.0402        |
|         |          |               |        | MP1                                 | 0.0226                       | 0.0339        |
|         |          |               |        | MP2, ROTI                           | <b>0.0210</b>                | 0.0383        |
|         |          |               |        | MP1, ROTI                           | 0.0331                       | 0.0440        |
|         |          |               |        | MP1, MP2                            | 0.0264                       | 0.0402        |
|         |          |               |        | MP1, MP2,<br>ROTI                   | <b>0.0210</b>                | 0.0383        |

Table S22. Change of the height and 3D positioning errors through the observation removal strategy based on MT at SNA0P on 2016-02-18. Improved RMSEs (m) are highlighted in bold.

| Station | Date     | Original RMSE |        | Permutations<br>and<br>combinations | Observation-<br>removed RMSE |               |
|---------|----------|---------------|--------|-------------------------------------|------------------------------|---------------|
|         |          | height        | 3D     |                                     | height                       | 3D            |
| SNA0P   | 20160218 | 0.1699        | 0.2148 | $\sigma_\phi$                       | <b>0.1645</b>                | 0.2167        |
|         |          |               |        | S4                                  | <b>0.1689</b>                | <b>0.2118</b> |
|         |          |               |        | $\sigma_\phi$ , S4                  | <b>0.1658</b>                | 0.2182        |
|         |          |               |        | ROTI                                | 0.2287                       | 0.2658        |
|         |          |               |        | MP2                                 | 0.1992                       | 0.2315        |
|         |          |               |        | MP1                                 | 0.1703                       | <b>0.2113</b> |
|         |          |               |        | MP2, ROTI                           | 0.1983                       | 0.2389        |
|         |          |               |        | MP1, ROTI                           | 0.1909                       | 0.2350        |
|         |          |               |        | MP1, MP2                            | 0.2092                       | 0.2577        |
|         |          |               |        | MP1, MP2,<br>ROTI                   | 0.1874                       | 0.2322        |

Table S23. Change of the height and 3D positioning errors through the observation removal strategy based on MT at SNA0P on 2016-04-02. Improved RMSEs (m) are highlighted in bold.

| Station | Date     | Original RMSE |        | Permutations<br>and<br>combinations | Observation-<br>removed RMSE |               |
|---------|----------|---------------|--------|-------------------------------------|------------------------------|---------------|
|         |          | height        | 3D     |                                     | height                       | 3D            |
| SNA0P   | 20160402 | 0.0087        | 0.0329 | $\sigma_\phi$                       | <b>0.0059</b>                | <b>0.0281</b> |
|         |          |               |        | S4                                  | <b>0.0062</b>                | <b>0.0287</b> |
|         |          |               |        | $\sigma_\phi$ , S4                  | <b>0.0059</b>                | <b>0.0281</b> |
|         |          |               |        | ROTI                                | <b>0.0077</b>                | <b>0.0326</b> |
|         |          |               |        | MP2                                 | <b>0.0066</b>                | <b>0.0319</b> |
|         |          |               |        | MP1                                 | <b>0.0064</b>                | <b>0.0298</b> |
|         |          |               |        | MP2, ROTI                           | <b>0.0061</b>                | <b>0.0315</b> |
|         |          |               |        | MP1, ROTI                           | <b>0.0060</b>                | <b>0.0296</b> |
|         |          |               |        | MP1, MP2                            | <b>0.0069</b>                | 0.0331        |
|         |          |               |        | MP1, MP2,<br>ROTI                   | <b>0.0064</b>                | <b>0.0328</b> |

Table S24. Change of the height and 3D positioning errors through the observation removal strategy based on MT at SNA0P on 2016-04-13. Improved RMSEs (m) are highlighted in bold.

| Station | Date     | Original RMSE |        | Permutations<br>and<br>combinations | Observation-<br>removed RMSE |               |
|---------|----------|---------------|--------|-------------------------------------|------------------------------|---------------|
|         |          | height        | 3D     |                                     | height                       | 3D            |
| SNA0P   | 20160413 | 0.8233        | 0.8521 | $\sigma_\phi$                       | <b>0.0831</b>                | <b>0.1741</b> |
|         |          |               |        | S4                                  | <b>0.5556</b>                | <b>0.5855</b> |
|         |          |               |        | $\sigma_\phi$ , S4                  | <b>0.0788</b>                | <b>0.1580</b> |
|         |          |               |        | ROTI                                | <b>0.2972</b>                | <b>0.3955</b> |
|         |          |               |        | MP2                                 | 0.8869                       | 0.9404        |
|         |          |               |        | MP1                                 | <b>0.7885</b>                | 0.8586        |
|         |          |               |        | MP2, ROTI                           | <b>0.3655</b>                | <b>0.4579</b> |
|         |          |               |        | MP1, ROTI                           | <b>0.3101</b>                | <b>0.3843</b> |
|         |          |               |        | MP1, MP2                            | 0.8351                       | 0.8954        |
|         |          |               |        | MP1, MP2,<br>ROTI                   | <b>0.3358</b>                | <b>0.4303</b> |

Table S25. Change of the height and 3D positioning errors through the observation removal strategy based on MT at SNA0P on 2016-05-09. Improved RMSEs (m) are highlighted in bold.

| Station | Date     | Original RMSE |        | Permutations<br>and<br>combinations | Observation-<br>removed RMSE |               |
|---------|----------|---------------|--------|-------------------------------------|------------------------------|---------------|
|         |          | height        | 3D     |                                     | height                       | 3D            |
| SNA0P   | 20160509 | 0.4466        | 0.5796 | $\sigma_\phi$                       | <b>0.2487</b>                | <b>0.2673</b> |
|         |          |               |        | S4                                  | <b>0.3828</b>                | <b>0.5038</b> |
|         |          |               |        | $\sigma_\phi$ , S4                  | <b>0.2486</b>                | <b>0.2672</b> |
|         |          |               |        | ROTI                                | <b>0.2345</b>                | <b>0.2629</b> |
|         |          |               |        | MP2                                 | <b>0.4373</b>                | 0.6193        |
|         |          |               |        | MP1                                 | <b>0.3512</b>                | <b>0.4326</b> |
|         |          |               |        | MP2, ROTI                           | <b>0.2269</b>                | <b>0.2532</b> |
|         |          |               |        | MP1, ROTI                           | <b>0.3006</b>                | <b>0.3249</b> |
|         |          |               |        | MP1, MP2                            | <b>0.3344</b>                | <b>0.4559</b> |
|         |          |               |        | MP1, MP2,<br>ROTI                   | <b>0.2963</b>                | <b>0.3186</b> |

Table S26. Change of the height and 3D positioning errors through the observation removal strategy based on MT at SNA0P on 2016-06-06. Improved RMSEs (m) are highlighted in bold.

| Station | Date     | Original RMSE |        | Permutations<br>and<br>combinations | Observation-<br>removed RMSE |               |
|---------|----------|---------------|--------|-------------------------------------|------------------------------|---------------|
|         |          | height        | 3D     |                                     | height                       | 3D            |
| SNA0P   | 20160606 | 0.5636        | 1.1350 | $\sigma_\phi$                       | 0.5722                       | <b>0.7549</b> |
|         |          |               |        | S4                                  | 0.5700                       | 1.2371        |
|         |          |               |        | $\sigma_\phi$ , S4                  | 0.7753                       | <b>1.0596</b> |
|         |          |               |        | ROTI                                | <b>0.5522</b>                | <b>0.6354</b> |
|         |          |               |        | MP2                                 | 0.6488                       | <b>1.1009</b> |
|         |          |               |        | MP1                                 | 1.1436                       | 1.6746        |
|         |          |               |        | MP2, ROTI                           | 1.3408                       | 1.4053        |
|         |          |               |        | MP1, ROTI                           | <b>0.1624</b>                | <b>0.3385</b> |
|         |          |               |        | MP1, MP2                            | 0.8409                       | 1.3097        |
|         |          |               |        | MP1, MP2,<br>ROTI                   | 1.5458                       | 1.5911        |

Table S27. Change of the height and 3D positioning errors through the observation removal strategy based on MT at SNA0P on 2016-07-28. Improved RMSEs (m) are highlighted in bold.

| Station | Date     | Original RMSE |        | Permutations<br>and<br>combinations | Observation-<br>removed RMSE |               |
|---------|----------|---------------|--------|-------------------------------------|------------------------------|---------------|
|         |          | height        | 3D     |                                     | height                       | 3D            |
| SNA0P   | 20160728 | 0.0099        | 0.0207 | $\sigma_\phi$                       | 0.0111                       | 0.0217        |
|         |          |               |        | S4                                  | <b>0.0092</b>                | <b>0.0204</b> |
|         |          |               |        | $\sigma_\phi$ , S4                  | 0.0106                       | 0.0215        |
|         |          |               |        | ROTI                                | 0.0109                       | 0.0214        |
|         |          |               |        | MP2                                 | 0.0114                       | 0.0218        |
|         |          |               |        | MP1                                 | 0.0128                       | 0.0252        |
|         |          |               |        | MP2, ROTI                           | 0.0117                       | 0.0220        |
|         |          |               |        | MP1, ROTI                           | 0.0157                       | 0.0255        |
|         |          |               |        | MP1, MP2                            | 0.0126                       | 0.0275        |
|         |          |               |        | MP1, MP2,<br>ROTI                   | 0.0126                       | 0.0256        |

Table S28. Change of the height and 3D positioning errors through the observation removal strategy based on MT at SNA0P on 2016-10-13. Improved RMSEs (m) are highlighted in bold.

| Station | Date     | Original RMSE |        | Permutations<br>and<br>combinations | Observation-<br>removed RMSE |               |
|---------|----------|---------------|--------|-------------------------------------|------------------------------|---------------|
|         |          | height        | 3D     |                                     | height                       | 3D            |
| SNA0P   | 20161013 | 0.0010        | 0.0228 | $\sigma_\phi$                       | 0.0039                       | 0.0238        |
|         |          |               |        | S4                                  | <b>0.0006</b>                | 0.0230        |
|         |          |               |        | $\sigma_\phi$ , S4                  | 0.0042                       | 0.0241        |
|         |          |               |        | ROTI                                | 0.0036                       | <b>0.0198</b> |
|         |          |               |        | MP2                                 | 0.0097                       | 0.0289        |
|         |          |               |        | MP1                                 | <b>0.0008</b>                | 0.0335        |
|         |          |               |        | MP2, ROTI                           | 0.0054                       | 0.0242        |
|         |          |               |        | MP1, ROTI                           | 0.0033                       | 0.0298        |
|         |          |               |        | MP1, MP2                            | 0.0043                       | 0.0378        |
|         |          |               |        | MP1, MP2,<br>ROTI                   | 0.0038                       | 0.0300        |

## References

1. Axelrad, P. and Brown, R.G., *GPS Navigation Algorithms*, in *Global Positioning System: Theory and Applications, Volume I*. 1996, American Institute of Aeronautics and Astronautics. p. 409-433.
2. Guo, F. and Zhang, X., Adaptive robust Kalman filtering for precise point positioning. *Measurement Science and Technology*, **2014**. 25(10): 105011.
3. Bahadur, B. and Nohutcu, M., PPPH: a MATLAB-based software for multi-GNSS precise point positioning analysis. *GPS Solutions*, **2018**. 22(4): 113.
